# Supplementary material
Source: Research Square preprint supplement (doi:10.21203/rs.3.rs-9707178/v1)
Supplement: Supplementary file 1 [file 4e767bcea34d678ba87bcb28.docx]

**Pubertal development and risks of eating disorders and muscle dysmorphia in adolescents: a Danish population-based follow-up study**

Anne Marie Ladehoff Thomsena, Andreas Ernsta,b, Katrine Strandberg-Larsenc, Charlotte Ulrikka Raskb,d, Anne Gaml-Sørensena, Thea Emily Bensona, Onyebuchi A. Arah a,e,f,g, Cecilia Høst Ramlau-Hansena

a Department of Public Health, Research Unit for Epidemiology, Aarhus University.

b Department of Clinical Medicine, Aarhus University, Aarhus, Denmark.

c Department of Public Health, Section of Epidemiology, University of Copenhagen.

d Department of Child and Adolescent Psychiatry, Research Unit, Aarhus University Hospital.

e Department of Epidemiology, Fielding School of Public Health, UCLA.

f Department of Statistics and Data Science, Division of Physical Sciences, UCLA College.

g Practical Causal Inference Lab, UCLA.

**Supplementary material**

**Supplementary Figure 1.** Flowchart of the eligible study populations for the main analyses with the outcomes clinically diagnosed anorexia nervosa and self-reported eating disorders in girls and muscle dysmorphia in boys within the Puberty Cohort nested within the Danish National Birth Cohort.

Children eligible for the Puberty Cohort

(n=56,641)

Not sampled for the Puberty Cohort

(n=34,207)

Children sampled for the Puberty Cohort

(n=22,434)

Participants not answering questions on puberty (n=6,616)

Study population 1

N=15,818 participants (n=8,123 girls and n=7,695 boys) in the Puberty Cohort with information on puberty at least once

Participants answering one questionnaire on pubertal development only (n=2,610)

Study population 2

N=13,208 participants (n=6,941 girls and 6,267 boys) with information on puberty at least twice

Participants not answering the DNBC 18-year follow-up (n=6,639):

Declined participation (n=5,181)

Withdrawn from the DNBC (n=1,458)

Participants not answering the DNBC 18-year follow-up (n=5,145):

Declined participation (n=3,687)

Withdrawn from the DNBC (n=1,458)

Study population 3

N=8,063 participants (girls n=4,935 and boys=3,128) answering both the Puberty Cohort and the 18-year follow-up with information on puberty at least twice

Study population 4

N=9,179 participants (n=5,554 girls and n=3,625 boys) answering both the Puberty Cohort and the 18-year follow-up with information on puberty at least once

Participants n=5,398 (n=3,243 girls and n=2164 boys) with information all potential confounding factors from the 7-year DNBC follow-up

N=5,813 participants (n=3,477 girls and n=2,336 boys) with information all potential confounding factors from the 7-year DNBC follow-up

N=9,782 participants (n=4,941 girls and n=4,841 boys) with information on all potential confounding factors from the 7-year DNBC follow-up

N=8,699 participants (n=4,500 girls and n=4,199 boys) with information on all potential confounding factors from the 7-year DNBC follow-up

**Supplementary Figure 2**. Directed acyclic graph used to guide the selection of confounding factors when examining the potential effect of pubertal timing and tempo on clinically diagnosed AN and self-reported eating disorders in girls, and self-reported muscle dysmorphia in boys.


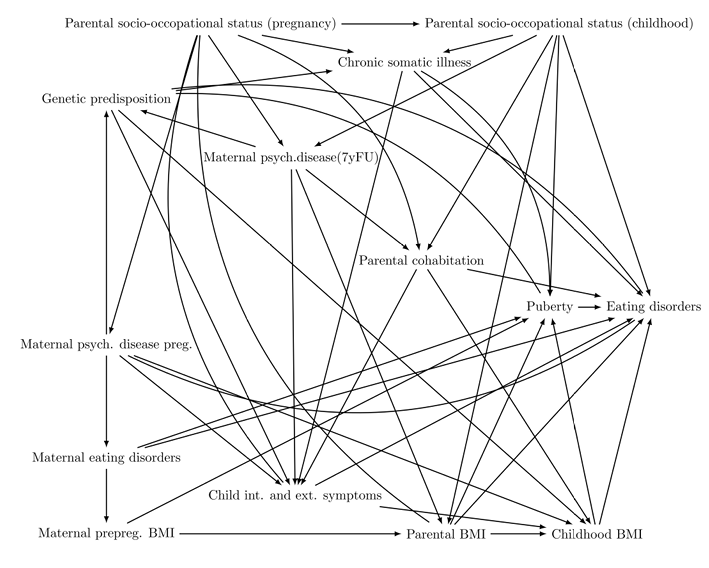


**Supplementary Figure 3.** Sampling and selection weights for girls and boys.

Abbreviations: (Samp): Sampling weight, (FU7-1 and FU7-2): Participation in the 7-year Danish National Birth Cohort (DNBC) follow-up (yes/no), and whether the participants had answered one (FU7-1) or at least two pubertal questionnaires (FU7-2), (PC1 and PC2): Participation in the Puberty Cohort (yes/no), and whether the participants had answered one (PC-1) or at least two pubertal questionnaires (PC-2), and (FU18-1 and FU18-2). Participation in the DNBC 18-year follow-up (yes/no), and whether the participants had answered one (FU18-1) or at least two pubertal questionnaires (FU18-2).

**Supplementary Figure 4a.** Restricted cubic spline plots for girls with clinically diagnosed anorexia nervosa.


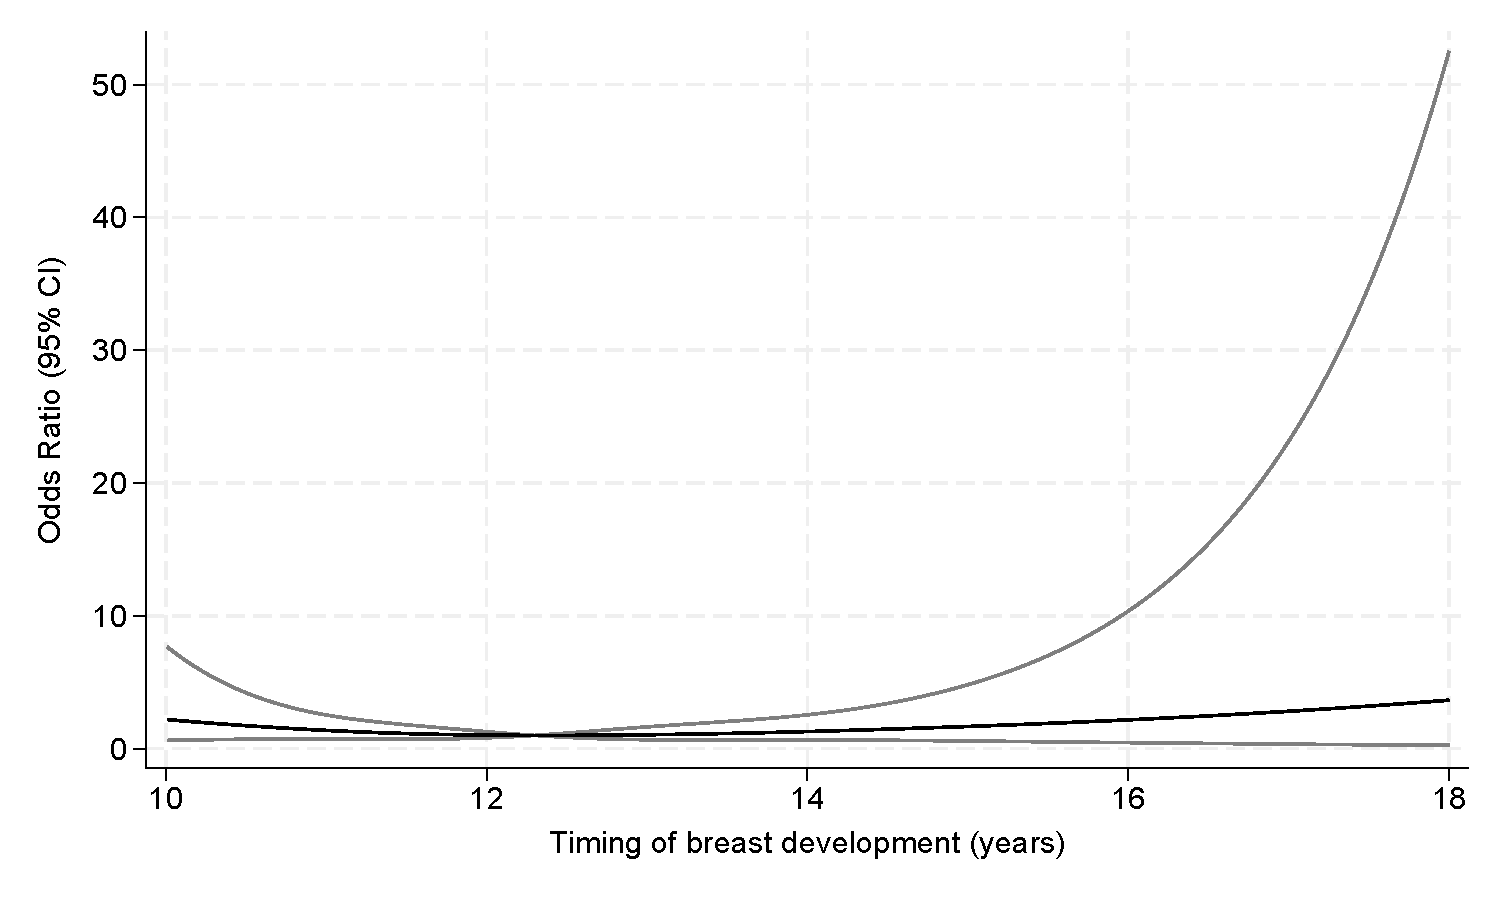


Adjusteda restricted cubic splines (four knots) at 5th, 35th, 65th, and 95th percentiles of the timing distribution (10.4, 11.8, 12.7, and 14.4 years) of the estimated odds ratio for clinically diagnosed anorexia nervosa by timing of breast development (total n = <4,500, 33 cases)b. The spline plot is presented relative to the mean value (12.3 years). The black line represents the estimated risk, and the grey lines indicate the upper and lower 95% confidence intervals.

a) Adjusted for the highest socio-occupational position of the parents in the first trimester, maternal psychiatric disease, cohabitation of parents, parental BMI, childhood BMI, childhood internalizing and externalizing symptoms, and chronic somatic illness in childhood from the 7-year follow-up.

b) <5 girls with clinically diagnosed anorexia nervosa before reaching Tanner stage 3 were excluded from the analyses (due to local data regulations, it is not allowed to report numbers smaller than 5).

**Supplementary Figure 4b.** Restricted cubic spline plots for girls with clinically diagnosed anorexia nervosa.

**
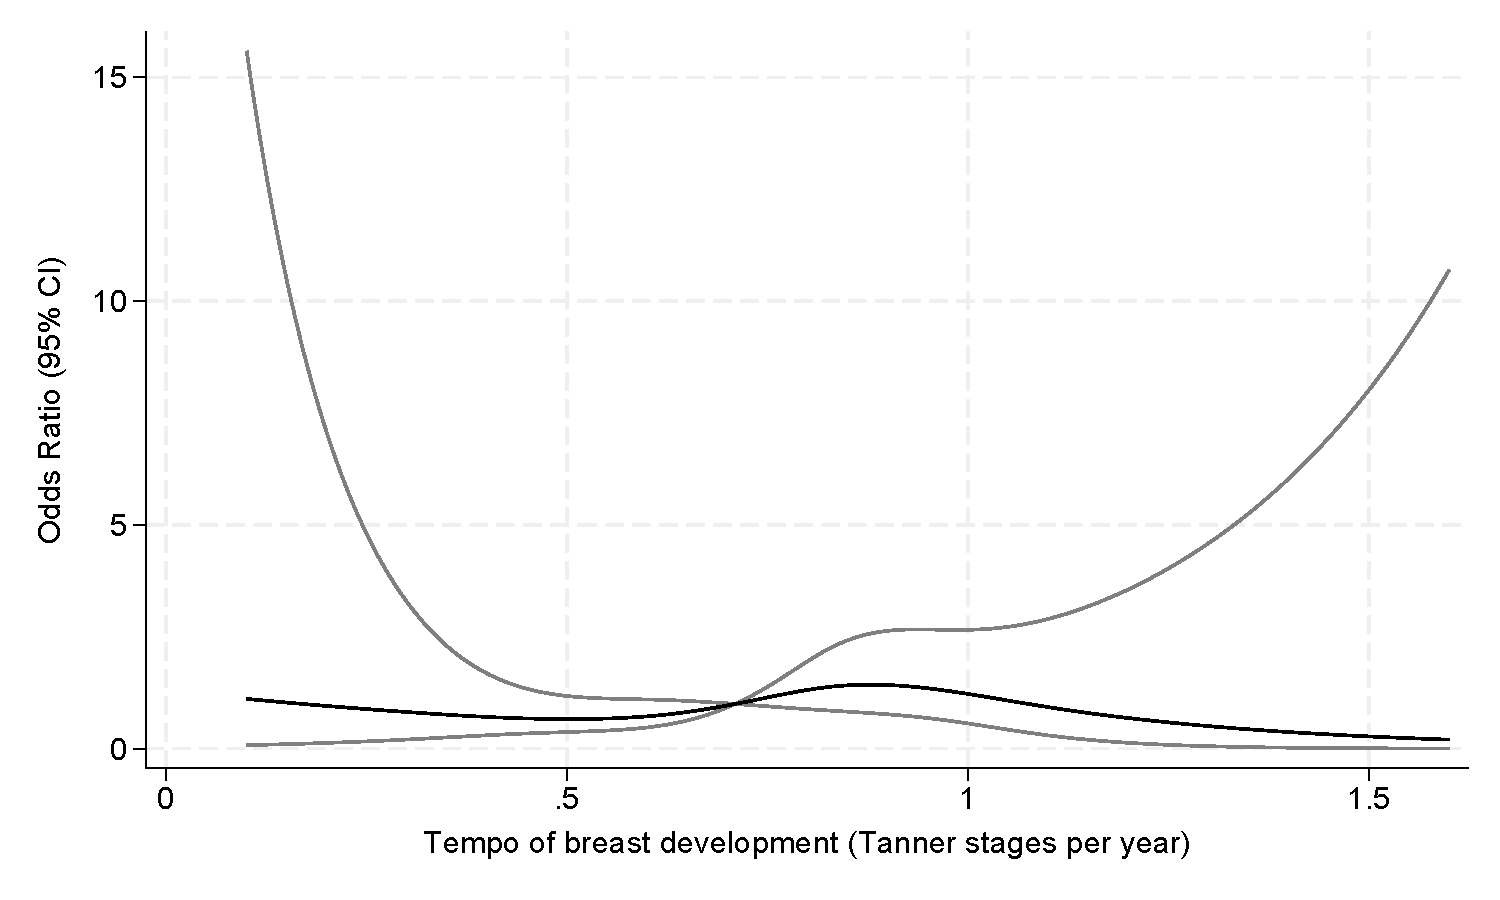
**

Adjusteda restricted cubic splines (four knots) at the 5th, 35th, 65th, and 95th percentiles of the tempo distribution (0.3, 0.6, 0.8, and 1.1 Tanner stages per year) of the estimated odds ratio for clinically diagnosed anorexia nervosa by tempo of breast development (total n = <4,500, 33 cases)b. The spline plot is presented relative to the mean value (0.7 Tanner stages per year). The black line represents the estimated risk, and the grey line indicate the upper and lower 95% confidence intervals.

a) Adjusted for the highest socio-occupational position of the parents in the first trimester, maternal psychiatric disease, cohabitation of parents, parental BMI, childhood BMI, childhood internalizing and externalizing symptoms, and chronic somatic illness in childhood from the 7-year follow-up.

b) <5 girls with clinically diagnosed anorexia nervosa before reaching Tanner stage 3 were excluded from the analyses (due to local data regulations, it is not allowed to report numbers smaller than 5).

**Supplementary Figure 5a**. Sub-analysis for girls for clinically diagnosed anorexia nervosa with risk time from the mean age at Tanner stage 2 (study populations 1 and 2).

Adjusteda odds ratios with 95% confidence intervals for clinically diagnosed anorexia nervosa by timing and tempo of mean age at achieving Tanner stage 2 and timing of age at menarche (Tanner stages: total n= 4,500, <38 cases; menarche: total n= 4,941, <43 cases)b,c.

a) Adjusted for the highest socio-occupational position of the parents in the first trimester, maternal psychiatric disease, cohabitation of parents, parental BMI, childhood BMI, childhood internalizing and externalizing symptoms, and chronic somatic illness in childhood from the 7-year follow-up.

b) <5 girls with clinically diagnosed anorexia nervosa before reaching Tanner stage 2 were excluded from the analyses (due to local dataregulations, it is not allowed to report numbers smaller than 5).

c) Missing data on age at menarche were addressed using multiple imputation as described in Supplementary Table 1.

**Supplementary Figure 6a.** Sub-analyses for girls for self-reported anorexia nervosa with exclusion of participants with eating disorder symptoms at the 11-year follow-up (study populations 3 and 4).

Adjusteda odds ratios with 95% confidence intervals for self-reported anorexia nervosa by timing and tempo of individual Tanner stage 3 and timing of age at menarche (Tanner stages: total n= 2,763, 27 cases, menarche: total n= 2,974, <32 cases)b,c.

a) Adjusted for the highest socio-occupational position of the parents in the first trimester, maternal psychiatric disease, cohabitation of parents, parental BMI, childhood BMI, childhood internalizing and externalizing symptoms, and chronic somatic illness in childhood from the 7-year follow-up.

b) 241 girls with self-reported anorexia nervosa at the 11-year follow-up were excluded from the analyses.

c) Missing data on age at menarche were addressed using multiple imputation as described in Supplementary Table 1.

**Supplementary Figure 6b.** Sub-analyses for girls for self-reported bulimia nervosa with exclusion of participants with eating disorder symptoms at the 11-year follow-up (study populations 3 and 4).

Adjusteda odds ratios with 95% confidence intervals for self-reported bulimia nervosa by timing and tempo of individual Tanner stage 3 and timing of age at menarche (Tanner stages: total n= <3,004, 38 cases, menarche: total n= <3,222, <43 cases)b,c.

a) Adjusted for the highest socio-occupational position of the parents in the first trimester, maternal psychiatric disease, cohabitation of parents, parental BMI, childhood BMI, childhood internalizing and externalizing symptoms, and chronic somatic illness in childhood from the 7-year follow-up.

b) <5 girls with self-reported bulimia nervosa at the 11-year follow-up were excluded from the analyses (due to local dataregulations, it is not allowed to report numbers smaller than 5).

c) Missing data on age at menarche were addressed using multiple imputations as described in Supplementary Table 1.

**Supplementary Figure 6c.** Sub-analyses for girls for self-reported binge eating disorder with exclusion of participants with eating disorder symptoms at the 11-year follow-up (study populations 3 and 4).

Adjusteda odds ratios with 95% confidence intervals for self-reported binge eating disorder by timing and tempo of individual Tanner stage 3, and timing of age at menarche (Tanner stages: total n= 3,226, 45 cases, menarche: total n= 3,469, <50 cases)b,c.

a) Adjusted for the highest socio-economic position of parents in the first trimester, maternal psychiatric disease, cohabitation of parents, parental BMI, childhood BMI, childhood internalizing and externalizing symptoms, and chronic somatic illness in childhood from the 7-year follow-up.

b) 8 girls with self-reported binge eating disorder at the 11-year follow-up were excluded from the analyses.

c) Missing data on age at menarche were addressed using multiple imputation as described in Supplementary Table 1.

**Supplementary Table 1**.The methodology used for multiple imputation (MI) of the pubertal milestones data (age at menarche, age at voice break, and first ejaculation).

|  | Methodology |
| --- | --- |
| Censored pubertal milestones | Every six months throughout puberty, the participants provided information on their exact age (in years and months) at attaining menarche, or first ejaculation. Most participants provided this information, with 81% for age at menarche and 63% reporting age at first ejaculation. For the remaining participants, the exact timing of these milestones was unknown, because data were left, interval-, or right-censored.  Moreover, the exact timing for age at voice break was also unknown, because this milestone was reported every six months. |
| Imputation for missing data | We used multiple imputation (MI) to estimate the exact timing of the pubertal milestones when exact timing was missing. |
| STATA’s -mi- package | MI using chained equations was performed with STATA’s -mi- package and conducted separately for girls and boys. |
| Assumptions of missing information | We assumed that missing information was missing at random. We assumed that residuals were normally distributed to model censored pubertal milestones (age at menarche in girls, or age first ejaculation and voice break in boys). |
| Covariates for imputation | The timing of the pubertal milestones was imputed using potential confounders from the Danish National Birth Cohort (DNBC) follow-ups (see Supplementary Figure 2), including timing and tempo of the Tanner stages and self-reported anorexia nervosa (AN), bulimia nervosa (BN), binge eating disorder (BN), and muscle dysmorphia at age 18 years. |
| Regression models for imputation of variables | Logistic regression:  Binary variables used: Maternal psychiatric disease in first trimester (yes, no), cohabitation of parents at age 7 years (yes, no), and self-reported AN, BN, BED, and muscle dysmorphia at age 18 years (yes, no). Clinically diagnosed anorexia nervosa and chronic somatic illness from the Danish National Patient Registry (yes/no).  Multinomial logistic regression:  Categorical variables used: Maternal age at menarche compared to peers (earlier, same time, later), highest socio-occupational position of the parents in the first trimester (high grade professional, low grade professional, skilled worker, unskilled worker, student or unemployed) according to occupation and level of education based on the Danish International Standard Class of Occupation and Education codes (ISCO-88 and ISCED).  Linear regression:  Maternal, paternal and child body mass index (BMI) at age 7 years of age, pubertal timing and tempo, and Strengths and Difficulties Questionnaire (SDQ) internalising and externalising subscales were included as normally distributed variables.  Interval-censored regression:  Age at menarche in girls, or age at first ejaculation and voice break in boys. |
| The imputation process | The imputation process involved 100 burn-in iterations and 100 imputed datasets. |

**Supplementary Table 2**. Outcome and covariate information from the Danish National Birth Cohort (DNBC) and the Danish National Patient Registry (DNPR)

| Self-reported outcomes with questions (items) from the 18-year DNBC follow-up |
| --- |
| Anorexia nervosa (AN):   - BMI (<18.5)   and   - Weight concern based on the following questions: G110_1: “How often have you felt too fat?”, G110_2: “How often have you felt that you wanted to be thinner?” and G110_3: “How often have you been worried about having too much fat on your body?” (1. Never, 2. Rarely, 3. Occasionally, 4. Often, 5. Every day, 0. Do not know) (The sum divided by number of items (mean score). Yes if mean score > 4.0).   or   - At least monthly fasting based on the following questions:. Yes if 3, 4, 5 or 6 in G104: “Have you fasted?” (1. Never, 2. Less than once a month, 3. 1-3 times a month, 4. Once a week, 5. Several times a week, 6. Every day, 7. Do not know)   or   - Engaged in excessive exercise. Yes if 4, 5 or 6 in G114: “Have you exercised to lose or avoid gaining weight?” (1. Never, 2. Less than once a month, 3. 1-3 times a month, 4. Once a week, 5. Several times a week, 6. Every day and 7. Do not know) and 1 or 2 in G115: “Difficult for you to attend school or work because you have spend a lot of time exercising?” (0. No, 1. Yes, occasionally, 2. Yes, often, 3. Do not know) and 2 or 3 in G116: “Do you feel guilty, if you skip working out/exercising?” (0. No, 1. Yes, occasionally, 2. Yes, often, 3. I never skip working out/exercising).   Bulimia nervosa (BN):   - BMI (>18.5)   and   - Weekly binge eating. Yes if 4, 5 or 6 in G107: “Within the last year, how often have you been binge eating?”( 1. Never, 2. Less than once a month, 3. 1-3 times a month, 4. Once a week, 5. Several times a week, 6. Every day, 7. Do not know) and 1 in G108_1”Did you feel that you could not stop eating even though you wanted to?” (1. Yes, 2. No, 3. Do not know)   and   - Weekly purging. Yes if 4, 5 or 6 in G105: “Have you thrown up on purpose to lose or avoid gaining weight? (1. Never, 2. Less than once a month, 3. 1-3 times a month, 4. Once a week, 5. Several times a week, 6. Every day, 7. Do not know) or 4, 5 or 6 in G106: “Have you taken laxatives or other types of medication to lose or avoid gaining weight?” (1. Never, 2. Less than once a month, 3. 1-3 times a month, 4. Once a week, 5. Several times a week, 6. Every day, 7. Do not know)   or   - Engaged in excessive exercise. Yes if 4, 5 or 6 in G114: “Have you exercised to lose or avoid gaining weight?” (1. Never, 2. Less than once a month, 3. 1-3 times a month, 4. Once a week, 5. Several times a week, 6. Every day and 7. Do not know) and 1 or 2 in G115: “Difficult for you to attend school or work because you have spend a lot of time exercising?” (0. No, 1. Yes, occasionally, 2. Yes, often, 3. Do not know) and 2 or 3 in G116: “Do you feel guilty, if you skip working out/exercising?” (0. No, 1. Yes, occasionally, 2. Yes, often, 3. I never skip working out/exercising).   Binge eating disorder (BED):   - Weekly binge eating. Yes if 4, 5 or 6 in G107: “Within the last year, how often have you been binge eating?” (1. Never, 2. Less than once a month, 3. 1-3 times a month, 4. Once a week, 5. Several times a week, 6. Every day, 7. Do not know) and 1 in G108_1”Did you feel that you could not stop eating even though you wanted to?” (1. Yes, 2. No, 3. Do not know)   and   - Experiencing abdominal pain. Yes if 1 in G108_2: “Did you eat until you had a stomach ache or felt sick? (1. Yes, 2. No, 3. Do not know)   and   - Guilt. Yes if 1 in G108_3: “Did you feel bad or guilty after eating too much food?” (1. Yes, 2. No, 3. Do not know)   and   - Absence of weekly purging. No if 1, 2 or 3 in G105: “Have you thrown up on purpose to lose or avoid gaining weight? (1. Never, 2. Less than once a month, 3. 1-3 times a month, 4. Once a week, 5. Several times a week, 6. Every day, 7. Do not know) or 1, 2 or 3 in G106: “Have you taken laxatives or other types of medication to lose or avoid gaining weight?” (1. Never, 2. Less than once a month, 3. 1-3 times a month, 4. Once a week, 5. Several times a week, 6. Every day, 7. Do not know)   and   - Absence of fasting. No if 1 or 2 in G104: “Have you fasted?” (1. Never, 2. Less than once a month, 3. 1-3 times a month, 4. Once a week, 5. Several times a week, 6. Every day, 7. Do not know)   and   - Absence of excessive exercise. No if 1, 2 or 3 in G114: “Have you exercised to lose or avoid gaining weight?” (1. Never, 2. Less than once a month, 3. 1-3 times a month, 4. Once a week, 5. Several times a week, 6. Every day and 7. Do not know) and 0 in G115: “Difficult for you to attend school or work because you have spend a lot of time exercising?” (0. No, 1. Yes, occasionally, 2. Yes, often, 3. Do not know) and 0 or 1 in G116: “Do you feel guilty, if you skip working out/exercising?” (0. No, 1. Yes, occasionally, 2. Yes, often, 3. I never skip working out/exercising)   Muscle dysmorphia   - Yes if 5 in G111:”How often have you thought about wanting toned or defined muscles?” (1. Never, 2. Rarely, 3. Occasionally, 4. Often, 5. Every day, 6. Do not know) and 5 or 6 in G112: “How often have you used nutritional supplements to build muscles?” (1. Never, 2. Less than once a month, 3.1-3 times a month, 4. Once a week, 5. Several times a week, 6. Every day, 7. do not know) or 2, 3, 4, 5 or 6 in G113: “How often have you used steroids to build muscles?” (1. Never, 2. Less than once a month, 3.1-3 times a month, 4. Once a week, 5. Several times a week,   6. Every day, 7. Do not know)  Outcome and covariate information from the Danish National Patient Registry (ICD-10 codes):  Clinically diagnosed anorexia nervosa:  F50.0 (anorexia nervosa)  F50.1 (atypical anorexia nervosa)  Clinically diagnosed bulimia nervosa:  F50.2 (bulimia nervosa)  F50.3 (atypical bulimia nervosa)  The covariate “chronic somatic illness”:  E05 (thyrotoxicosis (hyperthyroidism))  E27.1 (primary adrenocortical insufficiency)  E83.0 (disorders of copper metabolism)  E88.0 (disorders of plasma-protein metabolism, not elsewhere classified)  N18 (chronic kidney disease)  K74 (fibrosis and cirrhosis of liver)  K75 (other inflammatory liver diseases)  K76 (other diseases of liver)  K77 (liver disorders in diseases classified elsewhere)  C (All malignant neoplasms)  D (In situ, benign, uncertain/unknown behaviour neoplasms)  K50 (Crohn’s disease)  K51 (ulcerative colitis)  G71.0 (muscular dystrophy)  J44.9 (chronic obstructive pulmonary disease, unspecified)  M08 (juvenile arthritis)  M35.0 (Sjögren syndrome)  M35.2 (Behçet disease)  E10 (type 1 diabetes mellitus)  M32.1 (systemic lupus erythematosus with organ or system involvement)  M32.8 (other forms of systemic lupus erythematosus)  M32.9 (systemic lupus erythematosus, unspecified)  E84 (cystic fibrosis)  Q20 (congenital malformations of cardiac chambers and connections)  Q21 (congenital malformations of cardiac septa)  Q22 (congenital malformations of pulmonary and tricuspid valves)  Q23 (congenital malformations of aortic and mitral valves)  Q24 (other congenital malformations of heart)  Q25 (congenital malformations of great arteries)  Q26 (congenital malformations of great veins)  I50.1 (left ventricular failure)  I11.0 (hypertensive heart disease with (congestive) heart failure)  I13.0 (hypertensive heart and chronic kidney disease with heart failure)  I13.2 (hypertensive heart and chronic kidney disease with both heart failure and kidney failure) |

Abbreviations: The Danish National Birth Cohort (DNBC), International Classification of Diseases (ICD), Anatomical Therapeutic Chemical Classification (ATC-codes)

**Supplementary Table 3.** Inverse probability weights (IPWs) used in the study

|  | Methodology |
| --- | --- |
| Source population | The total number of eligible children for invitation to the Puberty Cohort: 56,641 live-born singletons whose mothers were enrolled in the Danish National Birth Cohort (DNBC) and completed the first-trimester baseline questionnaire and had not withdrawn by May 2012. |
| Invited sample | A total of 22,434 children were selected for invitation based on prenatal exposures which were hypothesized to influence pubertal development. Moreover, 8,000 randomly selected children were sampled to ensure that all children could be sampled at least once. |
| Sampling weights | We applied sampling weights to all analyses to ensure that the invited sample of 22,434 represented the total eligible population of 56,641. We reweighted the invited to a pseudo population corresponding to the source population (“Samp” in Figure 1). |
| Participation rates | Of the 22,434 invited, 15,818 children (70%) had at least one assessment of pubertal development. |
| Selection weights | Selection weights were calculated to adjust for non-participation based on the assumption that data were missing at random. This assumption that participants and non-participants had the same outcome distribution, after conditioning on a set of observed variables.  Applying selection weights to the analyses ensured that the 15,818 participants represented all the 22,434 children, reweighting the participants to a pseudo population corresponding to the 22,434 invited children.  We calculated selection weights separately for girls and boys. We first identified covariates that were potentially associated with participation in the different follow-up waves of the DNBC. These covariates were derived from the first pregnancy interview in the DNBC, the Danish Medical Birth Register (DMBR), the 7-year DNBC follow-up, and the Puberty Cohort.  We relied on participants to provide information on potential confounders from the 7-year DNBC follow-up, exposure data from the Puberty Cohort, and outcome data from the DNBC 18-year follow-up. Accordingly, we derived three selection weights, one for each follow-up, and whether the participants had answered one or at least two pubertal questionnaires. |
| Explanatory variables | The first pregnancy interview in the DNBC:  Highest socio-occupational position of the parents in the first trimester, cohabitation of parents during pregnancy, maternal smoking in first trimester, maternal alcohol intake in first trimester, maternal pre-pregnancy body mass index (BMI), maternal age at menarche relative to peers (earlier, same time, later), any maternal mental disorder, and maternal worries in first trimester.  DMBR:  Maternal age at delivery and parity.  7-year DNBC follow-up:  Childhood BMI, cohabitation of parents, internalising symptoms, externalising symptoms, maternal, paternal smoking, and any maternal psychiatric diseases.  The Puberty Cohort:  Timing and tempo of Tanner breast/genital development, timing and tempo of Tanner pubic hair development, age at menarche, age at first ejaculation, and voice break. |
| The 7-year DNBC follow-up IPWs | The first selection weight was estimated as the inverse probability of participation in the 7-year DNBC follow-up (yes/no), conditional on explanatory variables from the first DNBC interview and the DMBR, and whether the participants had answered one (FU7-1) or at least two pubertal questionnaires (FU7-2) (Figure 1) |
| The Puberty Cohort IPWs | The second selection weight was estimated as the inverse probability of participation in the Puberty Cohort (yes/no), conditional on explanatory variables from the first DNBC interview, the DMBR, and the 7-year DNBC follow-up, restricted to participants in the 7-year DNBC follow-up, and whether the participants had answered one (PC-1) or at least two pubertal questionnaires (PC-2) (Figure 1). |
| The 18-year DNBC follow-up IPWs | The third selection weight was estimated as the inverse probability of participation in the DNBC 18-year follow-up (yes/no), conditional on explanatory variables from the first DNBC interview, the DMBR, the 7-year DNBC follow-up, and the Puberty Cohort. We restricted to participants in both the 7-year DNBC follow-up and the Puberty Cohort and whether the participants had answered one (FU18-1) or at least two pubertal questionnaires (FU18-2) (Figure 1). |
| Multiplication of selection and sampling weights | We multiplied the sampling weight with the three selection weights, and whether the participants had answered one or at least two pubertal questionnaires:   1. Samp*FU7-1*FU18-1*PC-1 2. Samp*FU7-2*FU18-2*PC-2   Using these weights, the participants were reweighted to be representative of the 56,641 children (source population) eligible for the Puberty Cohort, based on the assumption that participation was missing at random. |

**Supplementary Table 4.** Frequency of clinically diagnosed anorexia nervosa in girls among participants and non-participants in the Puberty Cohort

|  | Girls | |
| --- | --- | --- |
|  | Participation | No Participation |
| Clinically diagnosed anorexia nervosa, n (%) | 56 (0.7) | 19 (0.7) |
| No clinically diagnosed anorexia nervosa, n (%) | 8,067 (99.3) | 2,849 (99.3) |
| Total, n (%) | 8,123 (100) | 2,868 (100) |
